# Supplementary material for: The control of epidermal growth factor grafted on mesoporous silica nanoparticles for targeted delivery
Source: Royal Society of Chemistry journal article supplement (doi:10.1039/c5tb00790a), 2015-01-01
Supplement: c5tb00790a1.pdf [file c5tb00790a1.pdf]

## Supporting information

### The Control of Epidermal Growth Factor Grafted on Mesoporous Silica Nanoparticles for Targeted Delivery

Xiaodong She<sup>1, a</sup>, Lijue Chen<sup>1, a</sup>, Leonora Velleman<sup>1</sup>, Chengpeng Li<sup>1</sup>, Canzhong He<sup>1</sup>, John Denman<sup>2</sup>, Tao Wang<sup>3</sup>, Sarah Shigdar<sup>3</sup>, Wei Duan<sup>3</sup>, Lingxue Kong<sup>1,\*</sup>

1. Institute for Frontier Materials, Deakin University, Waurn Ponds, Victoria 3216, Australia
2. Ian Wark Research Institute, University of South Australia, Mawson Lakes, SA 5095, Australia
3. School of Medicine, Deakin University, Waurn Ponds Vic 3216, Australia

\* Correspondence to: Lingxue Kong (E - mail: [lingxue.kong@deakin.edu.au](mailto:lingxue.kong@deakin.edu.au))

a. These authors have made equal contribution to this work.

#### Particle size distribution of HMSNs

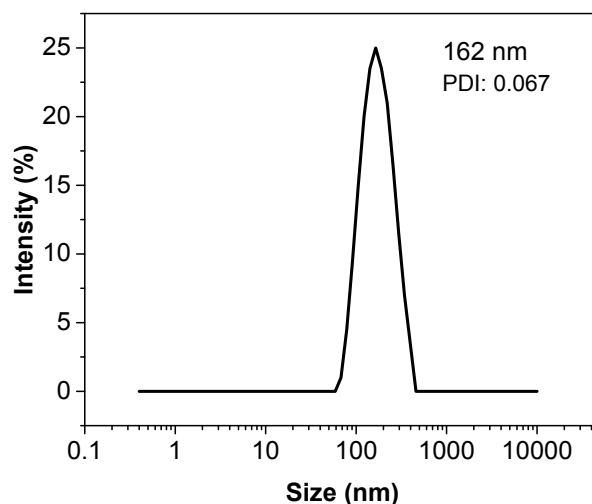

Figure S1 DLS curve of HMSNs



### Confocal images of FITC labelled HMSNs and HMSN-COOH-EGF

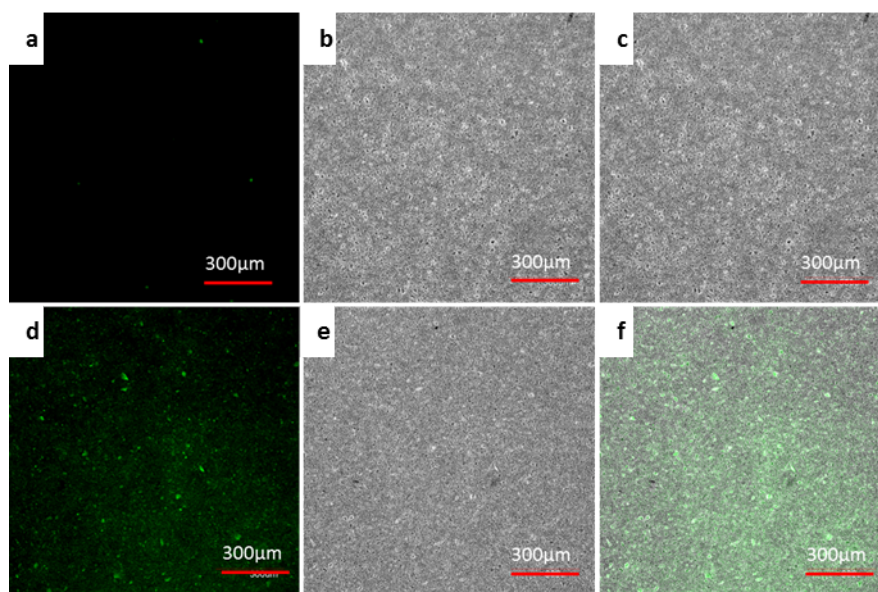

Figure S2 Confocal images of (a-c): FITC labelled HMSNs and (d-f): HMSN-COOH-EGF. a, d: FITC channel; b, e: bright field; c: merge of a and b; f: merge of d and e.

### Score plots of EGF, HMSNs, HMSN-NH<sub>2</sub> and HMSN-NH<sub>2</sub>-EGF

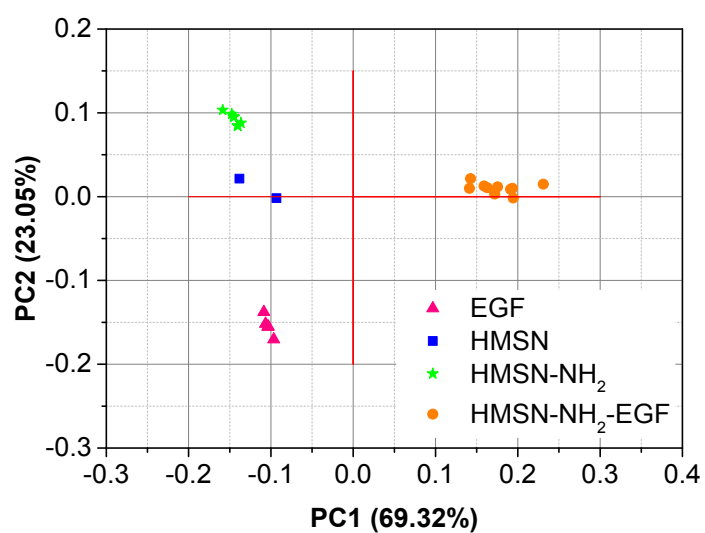

Figure S3 Score plot on PC1 and PC2 of EGF, HMSNs, HMSN-NH<sub>2</sub> and HMSN-NH<sub>2</sub>-EGF



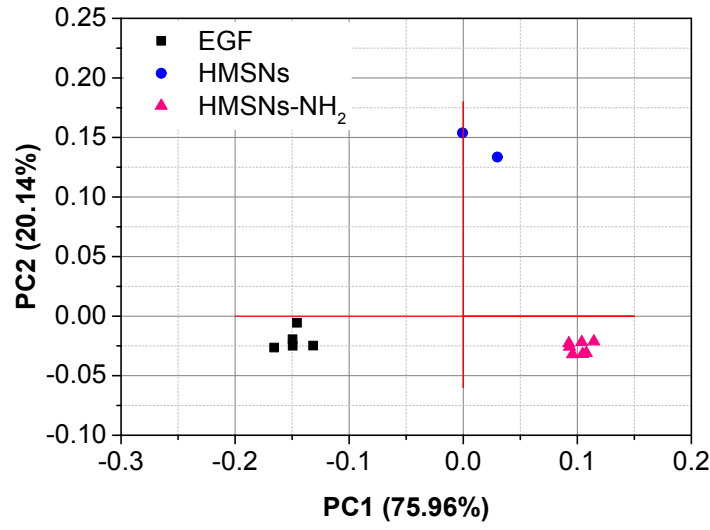

Figure S4 Score plot on PC1 and PC2 of EGF, HMSNs and HMSNs-NH<sub>2</sub>

### Quantify the EGF attachments on HMSNs

#### 1. Normalization

The intensities of samples were normalized by Equation (S1) and the results were presented in Table S1

$$I' = \frac{I - I_o}{I_e - I_o} \quad (S1)$$

where  $I_e$  and  $I_o$  are detected intensities of pure EGF and HMSNs-NH<sub>2</sub>, while  $I$  and  $I'$  are the intensities obtained before and after the normalization.

#### 2. Grafting efficiency of EGF ( $E$ )

The efficiency of EGF grafting of each sample was calculated using Equation (S2) and the results were listed in Table S1

$$E = (I_1' \frac{I_{e1}}{I_{e1} + I_{e2}} + I_2' \frac{I_{e2}}{I_{e1} + I_{e2}}) \times 100\% \quad (S2)$$



where  $I_1'$  and  $I_2'$  are normalized intensity of  $\text{CH}_5\text{N}_3^+$  and  $\text{C}_4\text{H}_8\text{N}^+$  fragments, respectively, and  $I_{e1}$  and  $I_{e2}$  are intensity of pure EGF corresponding to  $\text{CH}_5\text{N}_3^+$  and  $\text{C}_4\text{H}_8\text{N}^+$  fragments.

### 3. The quantity of EGF on HMSNs

The EGF concentration ( $\delta$ ) on HMSNs was calculated via Equation (S3) and the data were shown in Table S1

$$\delta = \frac{kC'E}{m} \quad (\text{S3})$$

where  $k$  and  $C'$  are the volume of EGF solution and the EGF concentration used for the grafting procedure, and  $m$  is the mass of HMSNs-NH<sub>2</sub> applied for the experiments.

Table S1 Data for the calculation of EGF concentration on HMSNs

| Parameters                    | $I$                     |                                | $I'$                    |                                | $E$ (%) | $\delta$<br>$\mu\text{g}_{(\text{EGF})}/\text{mg}_{(\text{HMSN})}$ |
|-------------------------------|-------------------------|--------------------------------|-------------------------|--------------------------------|---------|--------------------------------------------------------------------|
|                               | $I_1$                   | $I_2$                          | $I_1$                   | $I_2$                          |         |                                                                    |
| Immonium ions                 | $\text{CH}_5\text{N}_3$ | $\text{C}_4\text{H}_8\text{N}$ | $\text{CH}_5\text{N}_3$ | $\text{C}_4\text{H}_8\text{N}$ |         |                                                                    |
| Pure EGF                      | 0.009139                | 0.014642                       | 1                       | 1                              | 100     | -                                                                  |
| HMSN-NH <sub>2</sub>          | 0.001005                | 0.002011                       | 0                       | 0                              | 0       | 0                                                                  |
| HMSN-NH <sub>2</sub> -EGF-0.1 | 0.002669                | 0.005656                       | 0.2045                  | 0.2885                         | 25.63   | 0.8008                                                             |
| HMSN-NH <sub>2</sub> -EGF-0.2 | 0.003324                | 0.006889                       | 0.2851                  | 0.3861                         | 34.73   | 2.171                                                              |
| HMSN-NH <sub>2</sub> -EGF-0.4 | 0.004477                | 0.009042                       | 0.4268                  | 0.5566                         | 50.68   | 6.334                                                              |
| HMSN-NH <sub>2</sub> -EGF-0.8 | 0.006662                | 0.011858                       | 0.6955                  | 0.7795                         | 74.72   | 18.68                                                              |

### 4. Plot $C'$ to $\delta$

The relationship between the original EGF concentration for grafting ( $C'$ ) and the quantity of EGF on HMSNs ( $\delta$ ) was investigated by plotting  $C'$  to  $\delta$ . The results fitted very well to the model  $\delta = 25.75 C'^{1.52}$  with the  $R^2$  of 0.999 (Figure S5).



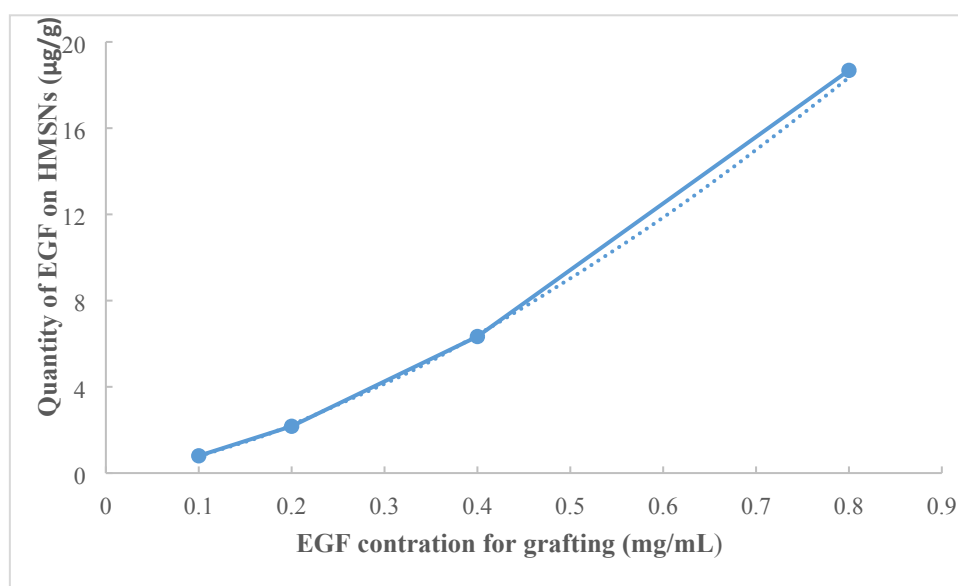

Figure S5 Plot on  $C'$  and  $\delta$  and the fitting model of EGF grafted samples
